# Supplementary material
Source: publisher figshare collection journal article supplement (https://acs.figshare.com/ndownloader/files/4595533)
Supplement: Supplementary file 1 [file 4595533]

## 2.3 Å X-ray Structure of the Heme-Bound GAF Domain of Sensory Histidine Kinase DosT of *Mycobacterium tuberculosis*

Larissa M. Podust, Alexandra Ioanoviciu, Paul R. Ortiz de Montellano

From the Department of Pharmaceutical Chemistry, University of California,  
San Francisco, CA 94158-2517.

### SUPPLEMENTAL FIGURES

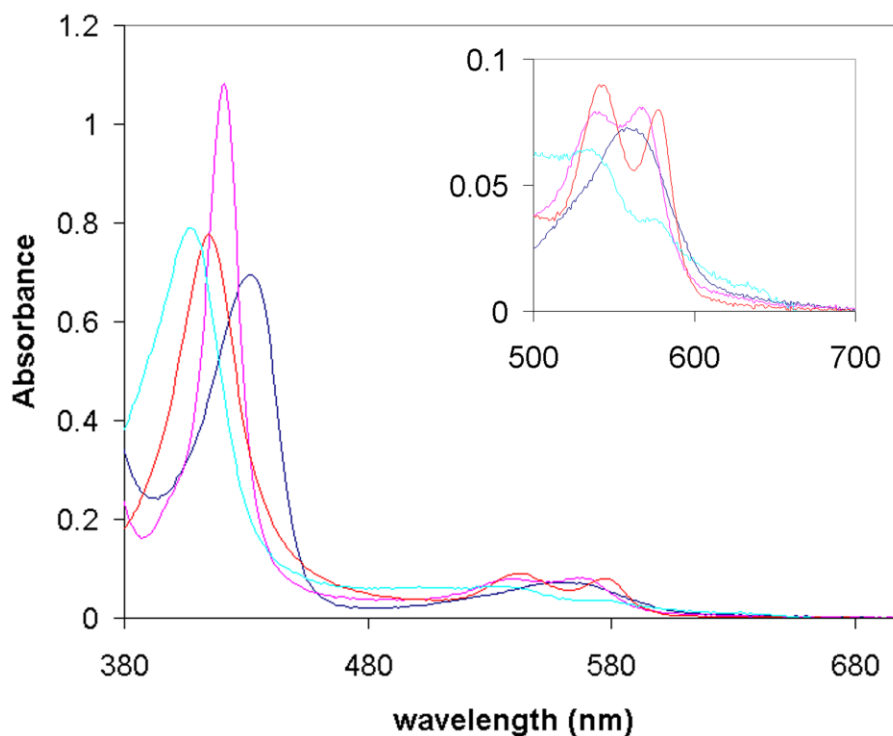

**Figure S1. UV-visible spectral characterization of GAF<sub>DosT</sub>.** Spectra of the ferric GAF<sub>DosT</sub>, *cyan*; ferrous GAF<sub>DosT</sub>, *dark blue*; ferrous GAF<sub>DosT</sub>-CO complex, *magenta*; and ferrous GAF<sub>DosT</sub>-O<sub>2</sub> complex, *red*, are shown. The insert shows an enlargement of the visible region of the spectra.

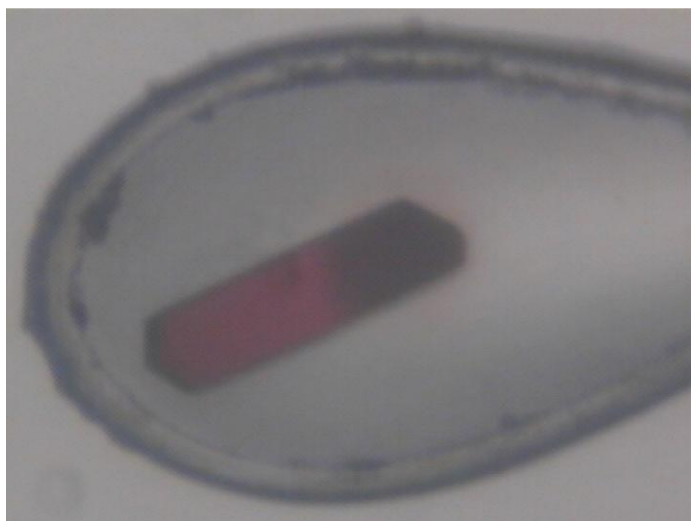

**Figure S2. GAF<sub>DosT</sub> x-ray induced photoreduction.** A snapshot of the GAF<sub>DosT</sub> crystal after collection of the two-wavelength anomalous diffraction data set is shown. The irradiated part of the crystal on the right is of a much darker red color.

Fig. S3 (page1)

*DosT\_M. tuberculosis* (O53473)

*DosT\_M. tuberculosis* (O53473) .....MTHPDRANVPNGSPPIRETLQLRLRELLLELVQDRIEQIVEGRDRLDGLDAI LAITS  
*M. smegmatis* (ABK70610) .....MGGVNGHHPRRDDQRTPLRDTLSQLRLRELLSEVQDRVEQIVEGRDRLDGLVEAMLVVTS  
*M. vanbaalenii* (ABM12229) .....MRPLRDTLSQLRLRELLNEVQDRVEQIVEGRDRLDGLJAMLVVTS  
*M. gilvum* (ABP46316) .....MHDGAVADADDHRRDARGPVRTLSQLRLRELLTEVQDRVEQIVIRGDRDLGLVEAMLAITS  
*DosS\_M. ulcerans* (ABL04774) MTDEPHPDAGPSLGVPSGDGLRLRLTLQLRLRELLLEVQDRVEQIVEGRDRLDGLVEAMLVVTS  
*DosS\_M. bovis* (BCG\_CAL73144) .....MTTGGVLDENDGAAMRPLRHTLSQLRLRELLLEVQDRVEQIVEGRDRLDGLVEAMLVVTA  
*DosS\_M. tuberculosis* (NP217648) .....MTTGGVLDENDGAAMRPLRHTLSQLRLRELLLEVQDRVEQIVEGRDRLDGLVEAMLVVTA  
*N. farcinica* (BAD57741) .....MLGMEGRSSRPGSNDPPIETLAQSRRLRELLAEVQDRIAEIVNVDRQMDRLIEAMLVVTA  
*Rhodococcus\_RHA1* (ABG91885) .....MTRQPDAGDRGPLLGSLSQLRLRELLAEVQDRIEQIVDA RDHV DGLIEAMLAITS  
*T. fusca* (AAZ57079) .....MADDTPNGERGVSFVPMRLDELLSELQVRINAVMLVDRVRSLLJAVVSI GS  
*S. coelicolor* (CAB53427) .....MENAEETREARVRLQLRLDELLLEELQARLDAAGTRDRVRSLLJAVVSVGR  
*S. tropica* (ABP54044) .....MTPSPQHHPATPSLGLTPLSRVHLDELLQEMLDLVSQVVASRRLLELJAVVGI ST  
*Nocardioide JS614* (ABL80469) .....MIDPGAAQTGATVSEHDGALSASTQA LLDAAVAIIS

*DosT\_M. tuberculosis* (O53473)

*DosT\_M. tuberculosis* (O53473) G L K I D A T L R A I V H T A A E L V D A R Y G A L G V R G Y D H R ... L V E F V Y E G I D E E T R H L I G S L P F G R G V L G A L  
*M. smegmatis* (ABK70610) G L E L D V I L R T I V H T A I E L V D A R Y G A L G V R G E D H H ... L I E F T Y E G I T P E V R E I G P L P G R G V L G V L  
*M. vanbaalenii* (ABM12229) G L E L D E L T I V R T A I D L V D A Q Y G A L G V R G H D H E ... L V E F T Y Q G I D E Q S K E L I G H L P G R G V L G V L  
*M. gilvum* (ABP46316) G L E L D E L T I V R T A I D L V D A Q Y G A L G V R G H D Q E ... L V E F T Y E G I D E P M R E I G H L P G R G V L G V L  
*DosS\_M. ulcerans* (ABL04774) G L E L D A T L R T I V H S A T N L V D A R Y G A L E V H D R D K R ... L V Q F V Y E G I D E T V A R I G H L P G L G I I G H L  
*DosS\_M. bovis* (BCG\_CAL73144) G L D L E A T L R A I V H S A T S L V D A R Y G A M E V H D R Q H R ... V L H F V Y E G I D E T V R R I G H L P K G L G V I G L L  
*DosS\_M. tuberculosis* (NP217648) G L D L E A T L R A I V H S A T S L V D A R Y G A M E V H D R Q H R ... V L H F V Y E G I D E T V R R I G H L P K G L G V I G L L  
*N. farcinica* (BAD57741) G L D L D N T L R S I V H T A I E L V D A K Y G A L G V R E S D R D S K E L A E F V Y E G I D D R T R V L I G D L P R G H G V L G L L  
*Rhodococcus\_RHA1* (ABG91885) G L D L D N I L T I V H A A I L V D A R Y G A L G V L G P G G G ... L S E F V F E G I D E E T R E I G D L P R G R G V I G L L  
*T. fusca* (AAZ57079) G L D L E S T L R R I V S T A M D L V D A R Y G A M G V I G P G G E ... L E Q F T P L G M S D E I A A V E H W P G R G L I G L L  
*S. coelicolor* (CAB53427) B I D L E Q A I R S I V E A A A A L V D A E Y A A L G V I G P D G K R ... L S A F H T V G V D A Q Q I A R I G P Y P G H G I I G L L  
*S. tropica* (ABP54044) D L D L R S T L Q R I V E A A S E L A G A R Y G A L G V L G R D . R T . L H D F V T H G I D D E Q R A K I G E L P H G R G V I G L L  
*Nocardioide JS614* (ABL80469) D L D L R A V L T R I V E A A S R T E G A E Y G A L G V V G S G S L ... L V E F V T T G I D D T R R L I G D P P H G H G I I G L L

Surface crevice

*DosT\_M. tuberculosis* (O53473)

*DosT\_M. tuberculosis* (O53473) T E E P K P T I R L D D I S R H P A S V G F P L P P M R T F L G V P V R I R D E V F G N L L T E K A D Q P F S D D D E V L V Q A  
*M. smegmatis* (ABK70610) I D D P K P I R L D D I R L P A S V G F P P N P P M R T F L G V P V R I R D K V F G N L L T E K T N Q P F S E D D E V L V Q A  
*M. vanbaalenii* (ABM12229) I D D P K P I R L D R I S Q H P A S V G F P P N P P M R T F L G V P V R I R D E V F G N L L T E K A D Q P F S E D D E V L V Q A  
*M. gilvum* (ABP46316) I N D P K P I R L E D I S R H A S V G F P P N P P M R T F L G V P V R I R D E V F G N L L T E K S D G Q P F S E D D E V L V Q A  
*DosS\_M. ulcerans* (ABL04774) I D E P K P I R L E D I S Q H P A S I G F P P S H P P M R T F L G V P V R V R D V S I G T L L T D K T N G Q P F S D D D E V L V Q A  
*DosS\_M. bovis* (BCG\_CAL73144) I E D P K P I R L D D V S A H P A S I G F P P Y P P M R T F L G V P V R V R D E S F G T L L T D K T N G Q P F S D D D E V L V Q A  
*DosS\_M. tuberculosis* (NP217648) I E D P K P I R L D D V S A H P A S I G F P P Y P P M R T F L G V P V R V R D E S F G T L L T D K T N G Q P F S D D D E V L V Q A  
*N. farcinica* (BAD57741) I T D P R P I R L A D M S A H P A S V G F P D H P P M R T F L G V P V Q V G G R V F G N L L T E K A G S G H F T E D D E V V V Q A  
*Rhodococcus\_RHA1* (ABG91885) I T N P K P V R L D D L S H S A S V G F P A B P P M K T F L G V P I Q I R D E V F G N L L T E K A N G S Q P F T E D D E V L I R A  
*T. fusca* (AAZ57079) I K E P K T I R L S C I S E H P S A G F P P G P P M R T F L G V P I R V R N E V F G N L L T E K R N N A V F D E E D E A I V T A  
*S. coelicolor* (CAB53427) I R H P E P I R L A K I L S D H P A S V G F P A H P P M N T F L G V P I R V R D E V F G N L L T E K R G G Q Q F D E D D E S V I A T  
*S. tropica* (ABP54044) I R D P R P V R M P D I T Q H P A S V G F P P N P P M R S F L G V P V R I R D Q V F G N L L A E A K R D A A E F T E D D E E I V V A  
*Nocardioide JS614* (ABL80469) I R D P E P I R L D D L T Q S S A V G F P P H P P M R S F L G V P V R I R G T V F G N L L T E K S G G A F T A E D D Q L L V E S

Proximal heme-binding motif

*DosT\_M. tuberculosis* (O53473)

*DosT\_M. tuberculosis* (O53473) L A A A A G I A V D N A R L F E E S R T R E A W I E A T R I G T Q M I A G A D F A M V F R L I A E A L T L M A G A A T L V A V P L  
*M. smegmatis* (ABK70610) L A A A A G I A V D N A R L Y E E S Q A R Q A W I A A T R I G T Q L L S G T D F A T V F R L V A A E A L T L T G A D G T L V A V P A  
*M. vanbaalenii* (ABM12229) L A A A A G I A I D N A R L Y Q S K T R R S W I E A T R I G T E M L S G A D E S K V F R L V A D Q S R L S G A Q S T L V A V P A  
*M. gilvum* (ABP46316) L A A A A G I A I D N A R L Y A Q S Q A R Q A W I E A T R I G T E L L S G I D F A G V F R R V A D R A Q L S G A A T L V A V P D  
*DosS\_M. ulcerans* (ABL04774) L A A A A G I A I A N A R L Y E Q A R Q A W I G A T R I A T E L L S G T E F A S V F R L V A E A L K L T S A D A L V A I P V  
*DosS\_M. bovis* (BCG\_CAL73144) L A A A A G I A V A N A R L Y Q Q A K A R Q S W I E A T R I A T E L L S G T E F A T V F R L V A A E A L K L T A D A L V A V P V  
*DosS\_M. tuberculosis* (NP217648) L A A A A G I A V A N A R L Y Q Q A K A R Q S W I E A T R I A T E L L S G T E F A T V F R L V A A E A L K L T A D A L V A V P V  
*N. farcinica* (BAD57741) L A A A A G I A I A N A R L Y E E S R I R Q A W I E A T Q V A T R L L A G G E T S E V F T V I T E R A L A L T G S A C A F L A I P E  
*Rhodococcus\_RHA1* (ABG91885) L A A A A G I A I E N A R L Y E E S R T R Q A W I E A T R E I A T E L L A G S E T A E V L Q V I A D D A L T A L T G A D S A F L A V P D  
*T. fusca* (AAZ57079) L A T A A G I A I D N A R L Y E E T R R R E T W L D A S D E I T T R L L S G T A P R E V L H L V A K K A R M A D A D L V A I A T P D  
*S. coelicolor* (CAB53427) L A V A A G V A I D N A R L Y E E S R L R E R L Q V N A B I T H T L S G A D Q G G V L P L A E R A R E I T G S A L S V A T P V  
*S. tropica* (ABP54044) L A A A A G V A I E N A R L Y E L A H R R E R W L A A A A E I T T L L G E V H R T D A L S L V A R R A R E V A E A E L A L V L L Y D  
*Nocardioide JS614* (ABL80469) L A S T A G F V I D N A R A Y G L S E R R R O H L E A S A E L T E M L Q P P I E L G R A L S Q V A R S A R S M S G A V A S V L R L D

*DosT\_M. tuberculosis* (O53473)

*DosT\_M. tuberculosis* (O53473) D D E A P A C E V D D I V I V E V A G E I S P A V K Q M T V A V S G T S I G G V F H D R T P ... R R F D R . L D I A . V D G P V E  
*M. smegmatis* (ABK70610) D P D A S A A E . . E L V I V E V A G A V P A P E A S A I P V Q D N A I G Q A F R D R A P ... R R L D V . L D . . . . G P G L  
*M. vanbaalenii* (ABM12229) D L D E L D G R V D E L V V V A T A G D . G P G V S L S A I P T H G S A I G E V F S T K T P . . . . V F R D T . L E L E . P . R H L A  
*M. gilvum* (ABP46316) D P D L P V G E V A E L T V A A S A G E . T T A A A H D P I P V A G T A I G D A F V H R T P . . . . G M T D R . A D I G . I . G A T V  
*DosS\_M. ulcerans* (ABL04774) D E D V P A S E V A Q L L V I E T V G N A V A A E G C T I A V A G T A L A E V L L D S A P . . . . R Q V D K . I A V E D V D E L G D  
*DosS\_M. bovis* (BCG\_CAL73144) D E D M P A A D V G E L L V I E T V G S A V A S I V G R T I P V A G A V L R E V F V N G I P . . . . R R V D R . V D E L G L D E I A D  
*DosS\_M. tuberculosis* (NP217648) D E D M P A A D V G E L L V I E T V G S A V A S I V G R T I P V A G A V L R E V F V N G I P . . . . R R V D R . V D E L G L D E I A D  
*N. farcinica* (BAD57741) D P D V P P E D L T E L V V V A A G A D A D . I T G T R L P M D E T H T G V A F R D R P . . . . L A V D T . A D A P S F A T S L E  
*Rhodococcus\_RHA1* (ABG91885) D P D I P S D E V T E L V V I A S A G T V S D R I I G R T I P V D K S T S G E A F R E R T P . . . . L R V T A L A F D P G F E T G T R  
*T. fusca* (AAZ57079) . . . . R D E E L V V R I A D G . . . . P D A S V V R G R S T P V E G S L T G R A F R G A D P I I T . E L A R E A S T P T L L H G L D  
*S. coelicolor* (CAB53427) . . . . S G T D T L A V E I A D G . . . . H E A D A W R G V L P V E G T L I G Q A F V Q R A P V H S A D E C R D S R V S A G P F E G  
*S. tropica* (ABP54044) . . . . P G A D T F T V D V V D G A G E Q A A L V G T V L P A A D T S F G A A V I H G R H . . . . D R V A D L A Y A A P W P A I F D  
*Nocardioide JS614* (ABL80469) N G T P V H T T A V D E A D A D R V G G A L E L I G D E V N F R G D V S P V G R T I G G L E . . . . .

Fig. S3 (page2)

*DosT M.tuberculosis* (053473)

DosT\_M.tuberculosis (O53473)  
M.smegmatis (ABK70610)  
M.vanbaalenii (AEM12229)  
M.gilvum (ABP46316)  
DosS\_M.ulcerans (ABL04774)  
DosS\_M.bovis (BCG\_CAL73144)  
DosS\_M.tuberculosis (NP217648)  
N.farcinica (BAD57741)  
Rhodococcus\_RHA1 (ABG91885)  
T.fusca (AAZ57079)  
S.coelicolor (CAB53427)  
S.tropica (ABP54044)  
Nocardioideis JS614 (ABL80469)

320 330 340 350 360 370 380

PGP ALVPLRLADTVAGVLVALRSADQPPFSDKQLDMMMAAFADQAALAWRLATFQRQMRSEVILTDR  
GCP ALVPLRLRADTVAGVLVAVQSGGARPFTELEDDMMATGFADQAALAVQLASSQRMRSELILADR  
PGP ALVPLRLRADTVAGVLVAVREFGAPPFNAELDMMMAAFVDQAALAWQLATFQRQLRELVLDR  
.GP ALLPLRLRADPAVGVLLVLRSVGAPQFPRSEDMLMAAFADQAALAVQLASTQHRQLRELGLTDR  
MGP ALVPLRLRADTVAGGVVLLHPSSESIVTEELDMMMAAFADQAALALQLATFSQRMRREL DVVTR  
AGP ALLPLRLRARGTVAGVVVVLSCQGGPFAFTELEDDMMMAAFADQAALAWQLATSQRMRREL DVLTDR  
AGP ALLPLRLRARGTVAGVVVVLSCQGGPFAFTELEDDMMMAAFADQAALAWQLATSQRMRREL DVLTDR  
YGP VLTPLRLRAGNAVGLLTMRALGMPVDAAGQAMMSAFADQAALALQMAATQRRMRELDVVSER  
FGPALADPLRAAQSGTVGLVTLRHVDALPFTDQLALMSGFADQAALAVQLANSQRMRRELDVLSDR  
IGPVVLVPPGASRRGVLLTGRKAGRLPFPFMTVQMLHAFAGHAAVLELAELARRHAEKRLIVLEDR  
LGP GVAVPIGSSAEARGVLLVRQSGGQEFSEETEPPLLVFAQAQAVAMELAERRADAEQIALLEDRE  
TGP AVLSPLATADTLHGVLLVAFEGDHHDTSEDIALLGSEFAADQAALAMERARQAEERELVLEDR  
... ALLVPLRLTHLVGSLVLLVFCAGHTPPPAFERALLASFAADQAALADRAOQIEDREELAVTSDR

Dost M.tuberculosis (053473)

DosT\_M.tuberculosis (O53473)  
M.smegmatis (ABK70610)  
M.vanbaalenii (AEM12229)  
M.gilvum (ABP46316)  
DosS\_M.ulcerans (ABL04774)  
DosS\_M.bovis (BCG\_CAL73144)  
DosS\_M.tuberculosis (NP217648)  
N.farcinica (BAD57741)  
Rhodococcus\_RHA1 (ABG91885)  
T.fusca (AAZ57079)  
S.coelicolor (CAB53427)  
S.tropica (ABF54044)  
Nocardioideis JS614 (ABL80469)

| 390 |   |   | 400 |   |   | 410 |   |   | 420 |   |   | 430 |   |   | 440 |   |   | 450 |   |   |   |   |   |   |   |   |   |   |   |   |   |   |   |   |   |   |   |   |   |   |   |   |   |   |   |   |   |   |   |   |   |   |   |   |   |   |     |   |   |   |   |   |   |   |   |
|-----|---|---|-----|---|---|-----|---|---|-----|---|---|-----|---|---|-----|---|---|-----|---|---|---|---|---|---|---|---|---|---|---|---|---|---|---|---|---|---|---|---|---|---|---|---|---|---|---|---|---|---|---|---|---|---|---|---|---|---|-----|---|---|---|---|---|---|---|---|
| D   | R | I | A   | D | L | H   | D | H | V   | I | Q | R   | L | F | A   | V | G | L   | T | L | Q | G | A | P | R | A | V | P | A | V | R | E | S | T | Y | S | S | I | D | D | L | Q | E | I | Q | E | I | R | S | A | I | F | D | L | H | A | G   | P | S | R | T |   |   |   |   |
| D   | R | I | A   | D | L | H   | D | H | V   | I | Q | R   | L | F | A   | V | G | L   | T | L | Q | G | T | I | P | R | A | S | A | E | V | Q | Q | R | I | A | D | C | V | D | D | L | Q | Q | V | I | Q | E | I | R | T | A | I | F | D | L | H   | T | P | A | G | G | T |   |   |
| D   | R | I | A   | D | L | H   | D | H | V   | I | Q | R   | L | F | A   | V | G | L   | T | L | Q | G | T | I | P | R | A | S | A | E | V | Q | Q | R | I | A | D | C | V | D | D | L | Q | Q | V | I | Q | E | I | R | T | A | I | F | D | L | H   | G | H | G | G | S | N |   |   |
| D   | R | I | A   | D | L | H   | D | H | V   | I | Q | R   | L | F | A   | V | G | L   | T | L | Q | G | S | I | A | R | A | S | E | V | Q | Q | R | I | A | D | C | V | D | D | L | Q | S | V | I | Q | E | I | R | T | A | I | F | D | L | H | G   | S | S | A | T |   |   |   |   |
| D   | R | I | A   | D | L | H   | D | H | V   | I | Q | R   | L | F | A   | I | G | L   | A | L | Q | G | S | V | P | R | T | R | E | P | K | V | Q | Q | R | L | S | D | V | D | D | L | Q | Q | V | I | Q | E | I | R | T | I | F | D | L | H | G   | S | S | Q | V | T |   |   |   |
| D   | R | I | A   | D | L | H   | D | H | V   | I | Q | R   | L | F | A   | I | G | L   | A | L | Q | G | A | V | P | H | E | R | N | P | E | V | Q | Q | R | L | S | D | V | D | D | L | Q | Q | V | I | Q | E | I | R | T | T | I | F | D | L | H   | G | A | S | Q | G | I | T |   |
| D   | R | I | A   | D | L | H   | D | H | V   | I | Q | R   | L | F | A   | I | G | L   | A | L | Q | G | A | V | P | H | E | R | N | P | E | V | Q | Q | R | L | S | D | V | D | D | L | Q | Q | V | I | Q | E | I | R | T | T | I | F | D | L | H   | G | A | S | Q | G | I | T |   |
| D   | R | I | A   | D | L | H   | D | H | V   | I | Q | R   | L | F | A   | V | G | L   | T | L | Q | G | T | V | S | R | A | R | A | P | E | I | K | T | R | L | M | D | T | V | N | D | V | Q | S | V | I | Q | E | I | R | H | S | I | F | D | H   | S | S | S | A | E | A | E | A |
| D   | R | I | A   | D | L | H   | D | H | V   | I | Q | R   | L | F | A   | V | G | L   | T | L | Q | G | S | T | L | Q | R | A | P | I | V | K | Q | R | L | Q | S | I | D | D | L | H | D | I | V | R | D | I | R | T | A | I | F | D | L | H | G   | S | S | G | G | M | T |   |   |
| D   | R | I | A   | K | D | L   | H | D | V   | I | Q | R   | L | F | A   | I | A | M   | S | L | M | S | V | R | R | E | D | D | T | V | A | Q | R | I | Q | A | V | D | D | L | H | D | T | I | Q | R | S | T | I | F | A | L | H | G | N | T | E   | G | G | F |   |   |   |   |   |
| D   | R | I | A   | D | L | H   | D | L | A   | I | Q | R   | L | F | A   | T | G | M   | T | L | Q | S | A | G | R | R | V | Q | D | P | M | A | S | E | R | I | L | R | A | V | D | D | L | D | E | T | I | K | I | R | S | T | I | F | G | L | R   | S | R | D | D | A | V |   |   |
| D   | R | I | A   | D | L | H   | D | V | I   | Q | R | L   | F | A | T   | G | L | Q   | S | A | P | M | S | T | R | E | L | A | N | R | I | N | A | V | D | D | L | D | A | T | I | K | D | I | R | T | I | F | E | R | T | I | F | E | R | T | ... | P | M | T |   |   |   |   |   |
| E   | R | I | A</ |   |   |     |   |   |     |   |   |     |   |   |     |   |   |     |   |   |   |   |   |   |   |   |   |   |   |   |   |   |   |   |   |   |   |   |   |   |   |   |   |   |   |   |   |   |   |   |   |   |   |   |   |   |     |   |   |   |   |   |   |   |   |

Autophosphorylation site

*DosT M. tuberculosis* (053473)

DosT\_M.tuberculosis (O53473)  
M.smegmatis (ABK70610)  
M.vanbaalenii (AEM12229)  
M.gilvum (ABP46316)  
DosS\_M.ulcerans (ABL04774)  
DosS\_M.bovis (BCG\_CAL73144)  
DosS\_M.tuberculosis (NP217648)  
N.farcinica (BAD57741)  
Rhodococcus\_RHA1 (ABG91885)  
T.fusca (AAZ57079)  
S.coelicolor (CAB53427)  
S.tropica (ABP54044)  
Nocardioideis JS614 (ABL80469)

460                      470                      480                      490                      500                      510  
 G. LRHRIDKVIDLAIPALHTVQYTGPLSVVDTVLANEAEAVLRBAVSNVVRHASTSLTNVS  
 R. LRQRIDEAIAQFS.GAGLHTTSCFVGPLSVVDAELDEAEAVLRBAVSNVVRHAGNELTVRK  
 R. LRQRIDEAIAQFT.SADVHTVQFVGPLSVVDPALSDAEAVVRBAVSNVVRHSGATLTDVSVT  
 R. LRQRIDAAVAAFPE.SGVRTSMQCAGPLSVVDAGLDEAEAVVRBAVSNVVRHAEASTVAVTVT  
 R. LRQRIDAAVAAFG.SGLRRTVQFVGPLSVVDNVLDAEAEAVVRBAVSNVVRHAAATLTLTVRK  
 R. LRQRIDAAVAQFAD.SGLRRTVQFVGPLSVVDSALADQAEAVVRBAVSNVVRHAKASTLTLTVRK  
 R. LRQRIDAAVAQFAD.SGLRRTVQFVGPLSVVDSALADQAEAVVRBAVSNVVRHAKASTLTLTVRK  
 PALRKRLHVAIAEMTEETDLRTSRLSGPVVLAPAMFDVEAVLRBAVSNVVRHAKASSLVRILT  
 Q.FRRRLHIEIVAEITADSGRLRTVHMSGPLSVIDAALDEAEAVLRBAVSNVVRHAGATVTVSIS  
 AWRRLRIDVVGAAATESLGFSPVRLDGPISAVPDSIAEEVLAVLRBAVSNVVRHARASQDITVQV  
 PGLRSRAVRAVGEAAPLLGFAPSVRMEGLDTHVPARTADEVMAVLTESLTNVARHARADRADVVLE  
 AQLRSRTRAEVDAAESLGFAPRLALAGPDSAVSDLEPDLTVLVRBAVSNVVRHARADRAVAVTVQ  
 PSRLRLRLQRLAREYAPLLGFDPTVTITVGGVDVAVPTVEVRDQLLVLRBAVSNVVRHAAAHAEIELA

Dost *M. tuberculosis* (053473)

DosT\_M.tuberculosis (O53473)  
M.smeagmati (ABK70610)  
M.vanbaalenii (AEM12229)  
M.gilvum (ABP46316)  
DosS\_M.ulcerans (ABL04774)  
DosS\_M.bovis (BCG\_CAL73144)  
DosS\_M.tuberculosis (NP217648)  
N.farcinica (BAD57741)  
Rhodococcus\_RHA1 (ABG91885)  
T.fusca (AAZ57079)  
S.coelicolor (CAB53427)  
S.tropica (ABP54044)  
Nocardioideis JS614 (ABL80469)

[illegible]

*DosT M.tuberculosis* (053473)

DosT\_M.tuberculosis (O53473)  
M.smegmatis (ABK70610)  
M.vanbaalenii (AEM12229)  
M.gilvum (ABP46316)  
DosS\_M.ulcerans (ABL04774)  
DosS\_M.bovis (BCG\_CAL73144)  
DosS\_M.tuberculosis (NP217648)  
N.farcinica (BAD57741)  
Rhodococcus\_RHA1 (ABG91885)  
T.fusca (AAZ57079)  
S.coelicolor (CAB53427)  
S.tropica (ABP54044)  
Nocardioideis JS614 (ABL80469)

**Figure S3. Heme-binding and ligand-binding motifs.** Multiple sequence alignments between putative two-component sensory protein-histidine kinases from different organisms are shown. Accession numbers of proteins in Swiss-Prot/TrEMBL (<http://us.expasy.org/sprot>) or NCBI (<http://www.ncbi.nlm.nih.gov>) databases are given next to the name of the host organism (*M. tuberculosis*, *Mycobacterium tuberculosis*; *M. smegmatis*, *Mycobacterium smegmatis*; *M. vanbaalenii*, *Mycobacterium vanbaalenii*; *M. gilvum*, *Mycobacterium gilvum*, *M. ulcerans*, *Mycobacterium ulcerans*; *M. bovis*, *Mycobacterium bovis*; *N. farcinica*, *Nocardia farcinica*; *T. fusca*, *Thermobifida fusca*; *S. coelicolor*, *Streptomyces coelicolor*, *S. tropica*, *Salinispora tropica*). Secondary structure annotation and residue numbering is according to GAF<sub>DosT</sub> of *M. tuberculosis*. The  $\alpha$ -helices are represented by *spirals* and  $\beta$ -strands by *arrows*. Alignments were performed using the MAP algorithm as implemented in the BCM Search Launcher (<http://searchlauncher.bcm.tmc.edu/multi-align/multi-align.html>). Residues constituting the proximal heme binding motif as deduced from the crystal structure are marked with *blue triangles*. Residues constituting the distal ligand-binding pocket are marked with *green squares*. Residues making up the surface crevice are marked with *pink triangles*. Invariant H147 and Y169 are highlighted in *cyan*. Highly conserved H392 implicated as the site of autophosphorylation is highlighted in *green*. The image was prepared by using program ESPript (<http://esprpt.ibcp.fr/ESPript/ESPript/>).
